# Supplementary material
Source: HighWire-hosted journal article supplement (https://www.jrheum.org/highwire/filestream/32741/field_highwire_adjunct_files/0/170494_Data_Suppl.pdf)
Supplement: 170494_Data_Suppl.pdf [file 170494_Data_Suppl.pdf]

**ONLINE SUPPLEMENTARY DATA**

**Supplementary Table 1.** Characteristics of real patients with peripheral inflammatory arthritis (data available on N=294).

| Characteristic                    | Frequency (%) |
|-----------------------------------|---------------|
| Female                            | 208 (70.7)    |
| Rheumatoid arthritis              | 222 (75.5)    |
| Seropositive rheumatoid arthritis | 107 (49.5)    |
| Erosive arthritis                 | 89 (32.8)     |
| Diagnosis < 1 year                | 53 (18.5)     |
| Diagnosis $\geq 1$ and <2 years   | 29 (10.1)     |
| Diagnosis $\geq 2$ and <3 years   | 38 (13.2)     |
| Diagnosis $\geq 3$ and <4 years   | 38 (13.2)     |
| Diagnosis $\geq 4$ and < 5 years  | 13 (4.5)      |
| Diagnosis 5 years and more        | 116 (40.4)    |
| Liver disease                     | 33 (12.6)     |
| Fibromyalgia                      | 19 (6.8)      |
| Any DMARD intake                  | 237 (80.6)    |
| Oral methotrexate                 | 104 (35.4)    |
| Subcutaneous methotrexate         | 77 (26.2)     |
| Hydroxychloroquine                | 127 (43.2)    |
| Sulfasalazine                     | 21 (7.1)      |
| Leflunomide                       | 20 (6.8)      |
| Prednisone                        | 36 (12.2)     |
| bDMARD                            | 110 (36.7)    |
| No antirheumatic drugs            | 25 (8.5)      |

**Supplementary Table 2.** Characteristics of primary care physicians (N=85).

| Characteristic                                                                | Result      |
|-------------------------------------------------------------------------------|-------------|
| Years of practice, mean $\pm$ standard deviation                              | 24 $\pm$ 10 |
| Number of patients with inflammatory arthritis, mean $\pm$ standard deviation | 15 $\pm$ 19 |
| Reference in rheumatology during the last year, number (%)                    | 70 (82.4)   |
| Enough / very interested in shared follow-up, number (%)                      | 62 (73.8)   |
| Comfortable to:                                                               |             |
| Prescribe nbDMARD before diagnosis of rheumatologist, number (%)              | 27 (32.5)   |
| Renewal nbDMARD prescription, number (%)                                      | 66 (78.6)   |
| Add nbDMARD after diagnosis of rheumatologist, number (%)                     | 34 (40.5)   |
| Renewal bDMARD, number (%)                                                    | 20 (23.8)   |
| Perform infiltrations with cortisone, number (%)                              | 59 (70.2)   |
| Prescribe prednisone in case of arthritis flare, number (%)                   | 80 (95.2)   |
